# Supplementary material
Source: PubMed Central journal article supplement (PMC3015122)
Supplement: supp_tpc.110.076216_Supplemental_Data_Final.pdf [file supp_tpc.110.076216_Supplemental_Data_Final.pdf]

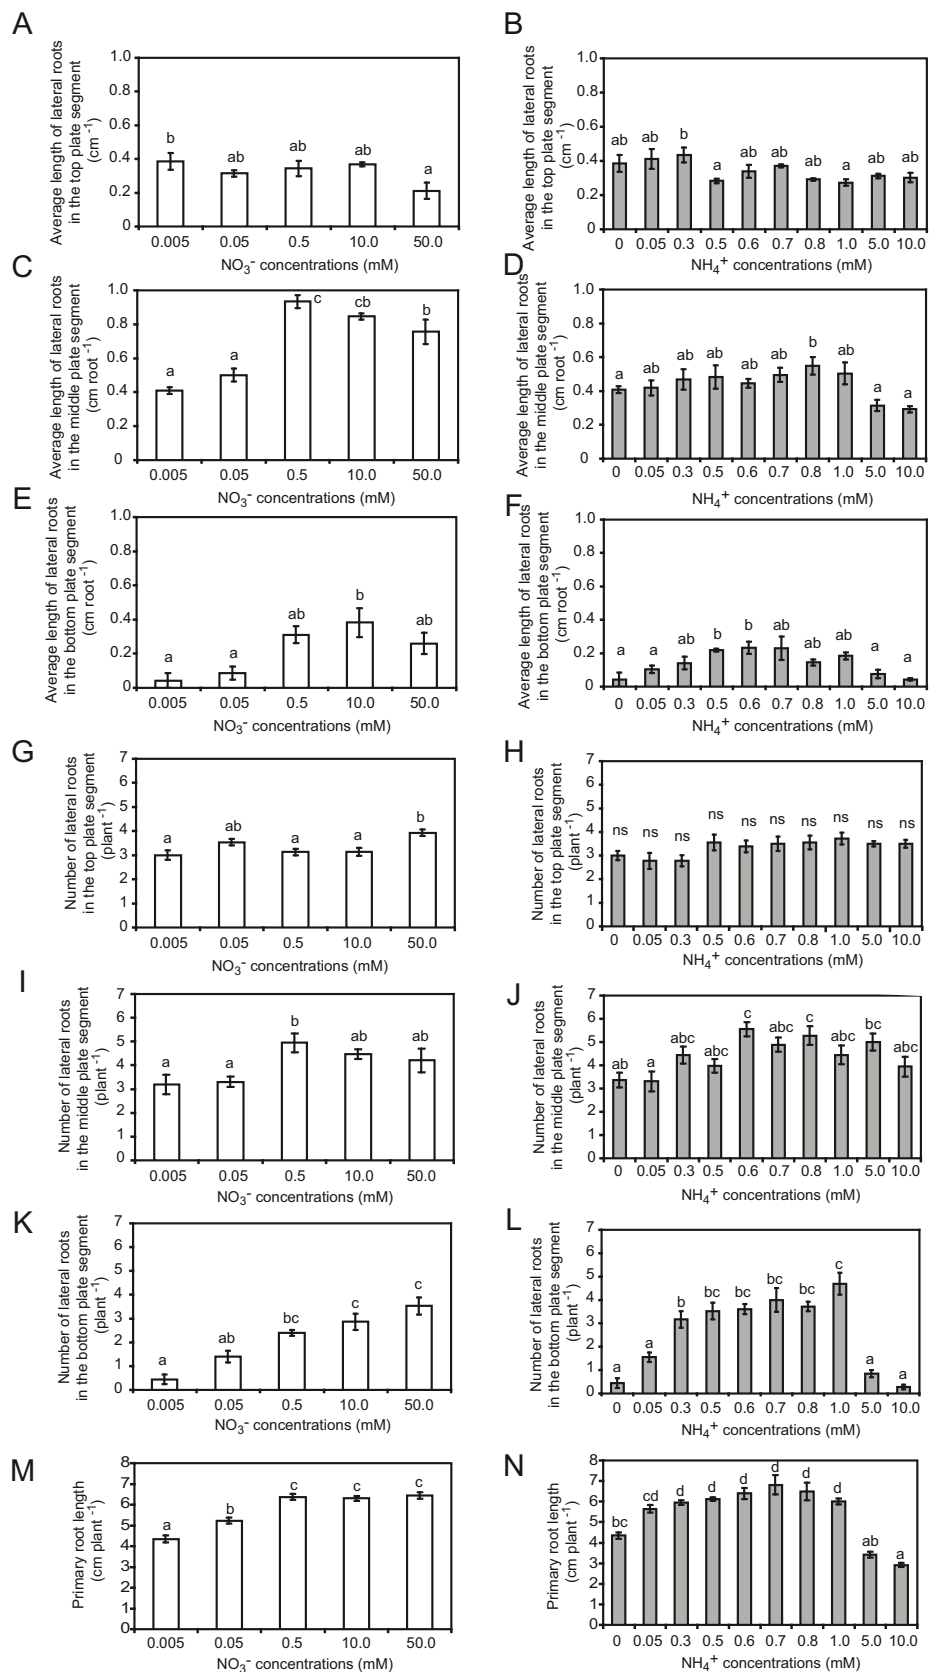

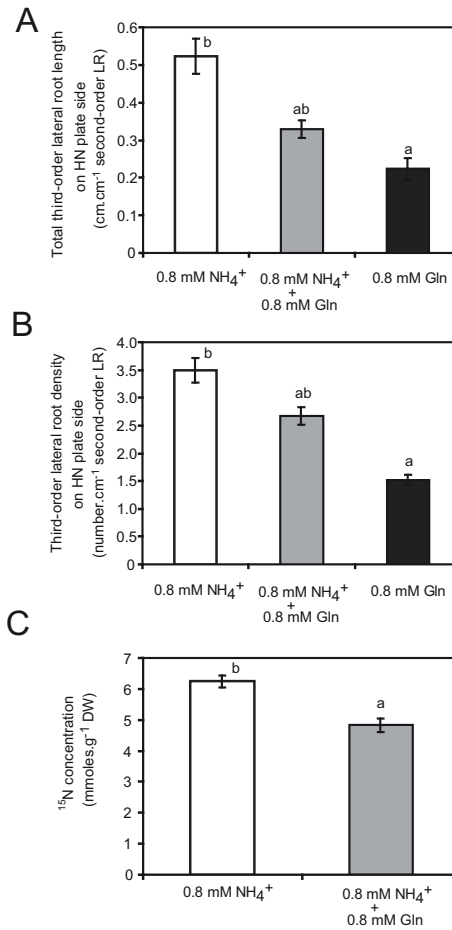

**Supplemental Figure 2. Glutamine represses ammonium-induced third-order lateral root branching.**

**(A)** Third-order lateral root length, **(B)** third-order lateral root density, and **(C)** <sup>15</sup>N concentrations in roots from <sup>15</sup>N-labeled ammonium supplied to the high N (HN) side. Wildtype plants were grown for 15 days on vertically-split agar plates with the first lateral root growing into a high N compartment (HN) with 0.8 mM <sup>15</sup>N-labeled NH<sub>4</sub>Cl, 0.8 mM <sup>15</sup>N-labeled NH<sub>4</sub>Cl together with 0.8 mM glutamine or 0.8 mM glutamine alone, while the remainder of the roots was growing without N supply. Bars represent mean values (± SE) of 10-15 individual plants and different letters denote significant differences among means at *P* < 0.05 (Tukey's test).

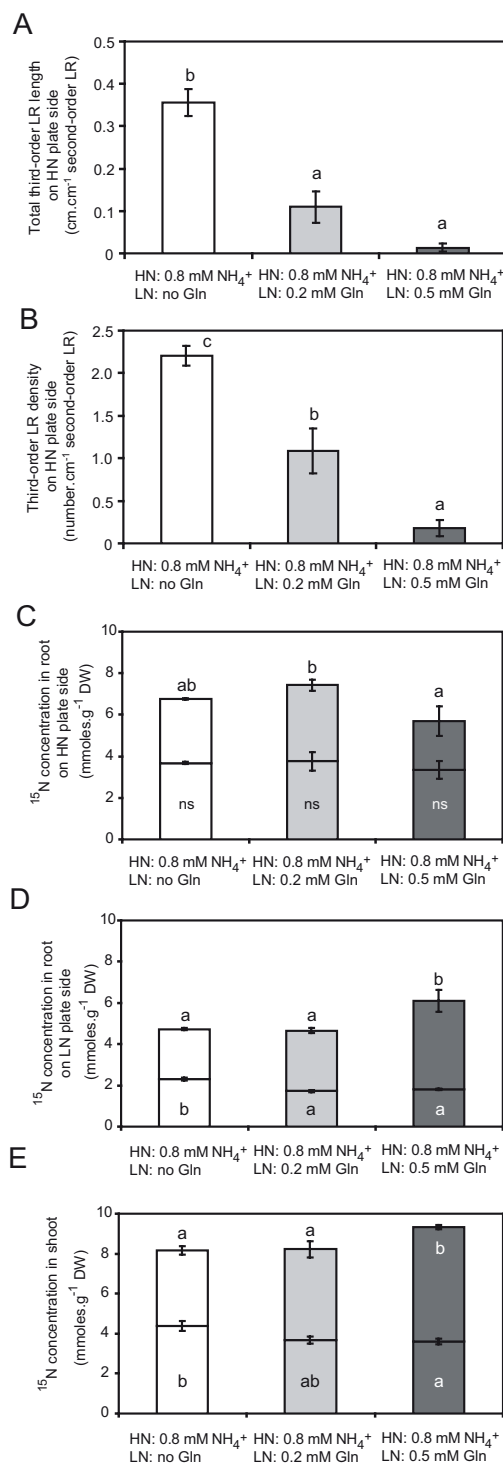

**Supplemental Figure 3. Systemic repression of ammonium-induced third-order lateral root branching by glutamine.**

(A) Third-order lateral root length, (B) third-order lateral root density, and (C to E) <sup>15</sup>N uptake from <sup>15</sup>N-labeled ammonium applied to the HN side and its distribution in plants. Concentrations of total nitrogen (<sup>14</sup>N+<sup>15</sup>N, outer bars) and <sup>15</sup>N (inner bars) in (C) roots from the high N (HN), (D) roots from low N (LN) side of the plate, and (E) shoots are indicated. Wild type plants were grown for 15 days on vertically-split agar plates with the first lateral root growing into a high N (HN) compartment supplied with 0.8 mM <sup>15</sup>N-labeled NH<sub>4</sub>Cl. Increasing concentrations of glutamine were added to the remainder of the roots growing in a low N compartment (LN). Bars represent mean values of 8-12 individual plants and different letters denote significant differences among means at  $P < 0.05$  (Tukey's test); ns, not significant.

**Supplemental Table 1. The presence of ammonium and nitrate triggers lateral root development.** Macroscopic measurements of total length and total numbers of first-, second- or third-order lateral roots as well as primary root length of Arabidopsis wildtype plants grown on vertically-split agar plates for 15 days on either local nitrogen supply (0.8 mM NO<sub>3</sub><sup>-</sup> or NH<sub>4</sub><sup>+</sup> on HN side with 5 μM NO<sub>3</sub><sup>-</sup> on the LN side; LN vs. NO<sub>3</sub><sup>-</sup> and LN vs. NH<sub>4</sub><sup>+</sup>) or homogenous nitrogen supply (0.8 mM NO<sub>3</sub><sup>-</sup> or NH<sub>4</sub><sup>+</sup> on both sides; NO<sub>3</sub><sup>-</sup> vs. NO<sub>3</sub><sup>-</sup> and NH<sub>4</sub><sup>+</sup> vs. NH<sub>4</sub><sup>+</sup>). Values represent means (± SE) of 12-20 individual plants and different letters denote significant differences among means at *P* < 0.05 (Tukey's test); nd, not determined.

|                                                              | HN plate side                                 |              |             |                                            |              |             | LN plate side                                 |             |               |                                            |             |  | Primary root length<br>(cm.plant <sup>-1</sup> ) |
|--------------------------------------------------------------|-----------------------------------------------|--------------|-------------|--------------------------------------------|--------------|-------------|-----------------------------------------------|-------------|---------------|--------------------------------------------|-------------|--|--------------------------------------------------|
|                                                              | Lateral root length (cm.plant <sup>-1</sup> ) |              |             | Lateral root number (plant <sup>-1</sup> ) |              |             | Lateral root length (cm.plant <sup>-1</sup> ) |             |               | Lateral root number (plant <sup>-1</sup> ) |             |  |                                                  |
|                                                              | First-order                                   | Second-order | Third-order | Second-order                               | Third-order  | First-order | Second-order                                  | Third-order | First-order   | Second-order                               |             |  |                                                  |
| LN vs NO <sub>3</sub> <sup>-</sup>                           | 10.60 ±0.45b                                  | 35.84 ±3.92b | 0.79 ±0.19a | 25.64 ±1.56c                               | 4.00 ±0.82a  | 46.60±3.35b | 1.97±1.02a                                    | nd          | 32.45±2.09n.s | 4.36±1.70a                                 | 13.96±0.59b |  |                                                  |
| NO <sub>3</sub> <sup>-</sup> vs NO <sub>3</sub> <sup>-</sup> | 8.54 ± 0.95b                                  | 11.24 ±3.52a | 0.12 ±0.10a | 13.60±1.89ab                               | 2.41 ±0.24a  | 58.81±4.51b | 27.58±4.87c                                   | nd          | 38.25±4.36n.s | 59.25±11.5b                                | 12.79±0.44a |  |                                                  |
| LN vs NH <sub>4</sub> <sup>+</sup>                           | 4.81 ±0.34a                                   | 7.45 ±0.58a  | 2.57 ±0.24b | 22.06±0.40bc                               | 18.88 ±0.41c | 28.88±1.68a | 1.85±0.24a                                    | 0.03±0.01a  | 28.06±1.70n.s | 8.24±1.09a                                 | 11.05±0.52a |  |                                                  |
| NH <sub>4</sub> <sup>+</sup> vs NH <sub>4</sub> <sup>+</sup> | 5.09 ±0.43a                                   | 4.46 ±1.35a  | 0.66 ±0.22a | 11.23 ±3.80a                               | 9.65 ±3.21b  | 20.29±2.97a | 7.80±2.37b                                    | 0.57±0.05b  | 37.00±3.46n.s | 59.33±5.48b                                | 11.17±0.82a |  |                                                  |

**Supplemental Table 2. Reconstituted expression of *AMT1;3* restores third-order lateral development in *qko* also when primary roots are pruned.**

Macroscopic analysis of total second- and third-order lateral root length and density on the ammonium-supplied side (HN, high N) and on the N-deficient side (LN, low N). Wildtype (Col-0), *qko* (*amt1;1*, *amt1;2*, *amt1;3*, *amt2;1*), *qko+11* (*amt1;2*, *amt1;3*, *amt2;1*) or *qko+13* plants (*amt1;1*, *amt1;2*, *amt2;1*; Yuan et al., 2007) were grown for 15 days on vertically-split agar plates with a localized supply of 0.8 mM ammonium. Values represent means ( $\pm$  SE) of 15-20 individual plants and different letters denote significant differences among means at  $P < 0.05$  (Tukey's test); ns, not significant.

|               | HN plate side                                      |                   |                                                   |                    | LN plate side                                      |                    |                                                   |                    |
|---------------|----------------------------------------------------|-------------------|---------------------------------------------------|--------------------|----------------------------------------------------|--------------------|---------------------------------------------------|--------------------|
|               | Total lateral root length (cm.cm <sup>-1</sup> LR) |                   | Lateral root density (number.cm <sup>-1</sup> LR) |                    | Total lateral root length (cm.cm <sup>-1</sup> LR) |                    | Lateral root density (number.cm <sup>-1</sup> LR) |                    |
|               | Second-order                                       | Third-order       | Second-order                                      | Third-order        | Second-order                                       | Third-order        | Second-order                                      | Third-order        |
| wt            | 2.06 $\pm$ 0.13 ns                                 | 0.47 $\pm$ 0.03 b | 5.02 $\pm$ 0.22 a                                 | 2.83 $\pm$ 0.36 c  | 1.84 $\pm$ 0.18 ns                                 | 0.11 $\pm$ 0.05 ns | 2.39 $\pm$ 0.17 ns                                | 0.35 $\pm$ 0.07 ns |
| <i>qko+11</i> | 2.12 $\pm$ 0.12 ns                                 | 0.26 $\pm$ 0.02 a | 6.21 $\pm$ 0.49 b                                 | 1.76 $\pm$ 0.16 ab | 1.51 $\pm$ 0.12 ns                                 | 0.09 $\pm$ 0.03 ns | 2.33 $\pm$ 0.12 ns                                | 0.28 $\pm$ 0.08 ns |
| <i>qko+13</i> | 1.84 $\pm$ 0.07 ns                                 | 0.44 $\pm$ 0.05 b | 5.33 $\pm$ 0.30 ab                                | 2.50 $\pm$ 0.19 bc | 1.43 $\pm$ 0.10 ns                                 | 0.05 $\pm$ 0.02 ns | 2.32 $\pm$ 0.10 ns                                | 0.20 $\pm$ 0.05 ns |
| <i>qko</i>    | 2.21 $\pm$ 0.34 ns                                 | 0.15 $\pm$ 0.02 a | 4.24 $\pm$ 0.38 a                                 | 1.02 $\pm$ 0.11 a  | 1.55 $\pm$ 0.24 ns                                 | 0.02 $\pm$ 0.01 ns | 2.81 $\pm$ 0.15 ns                                | 0.17 $\pm$ 0.02 ns |
